# Supplementary material
Source: publisher figshare collection journal article supplement (https://acs.figshare.com/ndownloader/files/15508286)
Supplement: Supplementary file 1 [file 15508286]

## Supporting Information

### **Impact of the Mechanical Properties of a Functionalized Cross-linked Binder on the Longevity of Li-S Batteries**

*C. Y. Kwok,<sup>a</sup> Q. Pang,<sup>a</sup> A. Worku,<sup>b</sup> X. Liang,<sup>a</sup> M. Gauthier,<sup>b\*</sup> L. F. Nazar<sup>a\*</sup>*

<sup>a</sup>Waterloo Institute of Nanotechnology and Department of Chemistry, University of Waterloo, 200 University Ave. W., Waterloo, Ontario, N2L 3G1, Canada

<sup>b</sup>Department of Chemistry, University of Waterloo, 200 University Ave. W., Waterloo, Ontario, N2L 3G1, Canada

\* Correspondence to be addressed to L. F. Nazar (e-mail: [lfnazar@uwaterloo.ca](mailto:lfnazar@uwaterloo.ca)) or M. Gauthier (e-mail: [gauthier@uwaterloo.ca](mailto:gauthier@uwaterloo.ca))

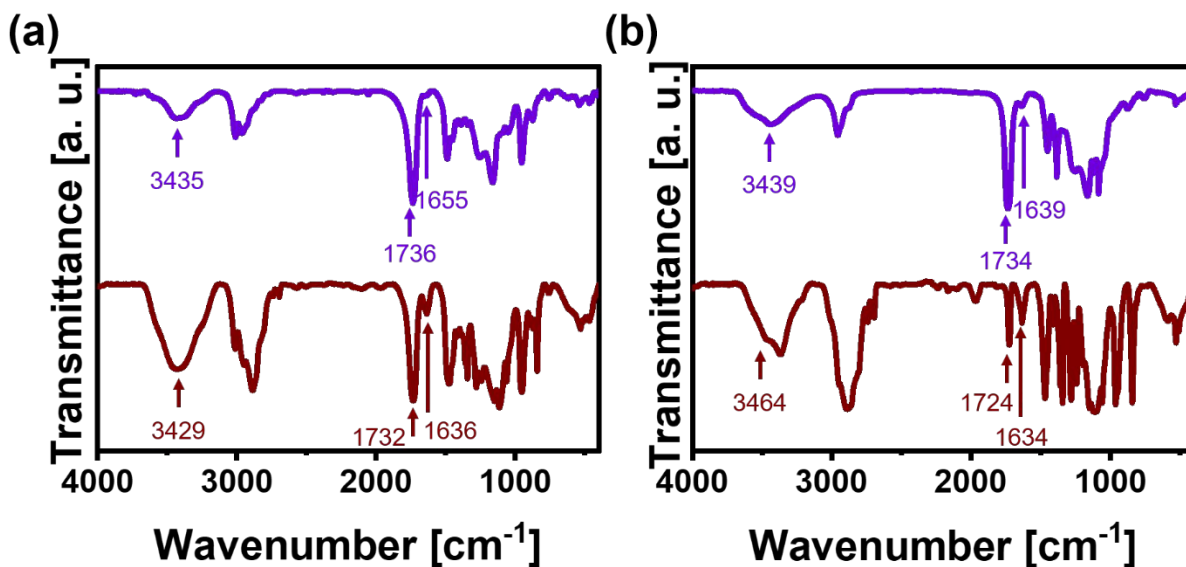

**Figure S1.** FTIR transmission spectra for (a) poly(AETMAC-*co*-EGDA) and (b) poly(DADMAC-*co*-EGDA), respectively, to confirm cross-linking: physical mixture of their homopolymer counterparts (burgundy), and the cross-linked polymer (purple).

**Discussion of Figure S1.** The successful cross-linking copolymerization to produce poly(AETMAC-*co*-EGDA) and poly(DADMAC-*co*-EGDA) is confirmed by their FTIR spectra (**Figure S1, purple curve**) where an absence of alkene (C=C or =CH) bands in the materials is noted. This suggests a complete conversion of the precursor monomer, where the residual monomers were washed away in the purification steps. Instead, the spectrum in **Figure S1a** exhibits ester C=O (1736 cm<sup>-1</sup>) and C-N (1655 and 3435 cm<sup>-1</sup>) moitiés.<sup>1</sup> Furthermore, compared with the FTIR spectrum of the physical mixture of poly(AETMAC)-poly(EGDA) homopolymer material (**Figure S1a, burgundy curve**), the band attributed to the C-N stretching vibration in the secondary amine group and the C=O stretching band in the ester group are shifted from 3429 to 3435 cm<sup>-1</sup> and 1732 to 1736 cm<sup>-1</sup>, respectively, indicative of strong bonding interactions within the polymer due to the copolymerization linkage.

Similarly, the successful cross-linking of DADMAC by EGDA to form poly(DADMAC-*co*-EGDA) was also confirmed by FTIR (**Figure S1b, purple curve**): peaks attributed to poly(DADMAC-*co*-EGDA): are ester C=O (1734 cm<sup>-1</sup>) and C-N (1639 and 3439 cm<sup>-1</sup>) groups.<sup>2</sup> The characteristic peaks ascribed to the C-N and C=O groups in poly(DADMAC-*co*-EGDA) are also significantly shifted compared to their homopolymer mixture (**Figure S1b, burgundy curve**).

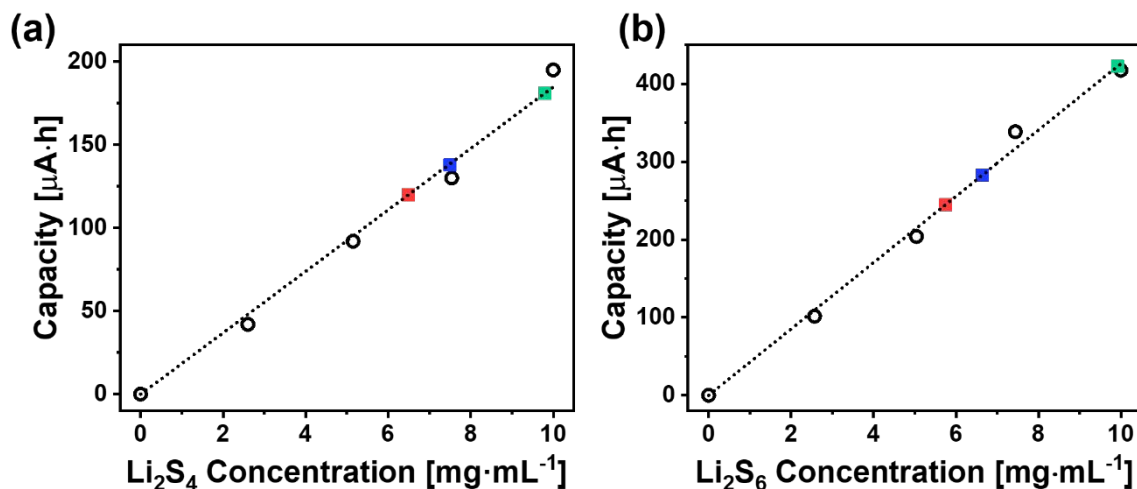

**Figure S2.** Calibration plot (open circles) derived from the capacity by oxidizing a known concentration of (a)  $\text{Li}_2\text{S}_4$  and (b)  $\text{Li}_2\text{S}_6$  in DME to sulfur. Experimental points (solid squares) were mapped on the curve for poly(AETMAC-*co*-EGDA) (red), poly(DADMAC-*co*-EGDA) (blue), and PVdF (green) using the same method, providing a quantitative metric for their polysulfide adsorptivity.

**Discussion of Figure S2.** A total of five calibration solutions and three polymeric binder materials were analyzed for each lithium polysulfide. The capacity achieved for all calibration and sample solutions are plotted ( $R^2_{\text{Li}_2\text{S}_4} = 0.998$  and  $R^2_{\text{Li}_2\text{S}_6} = 0.999$ ).

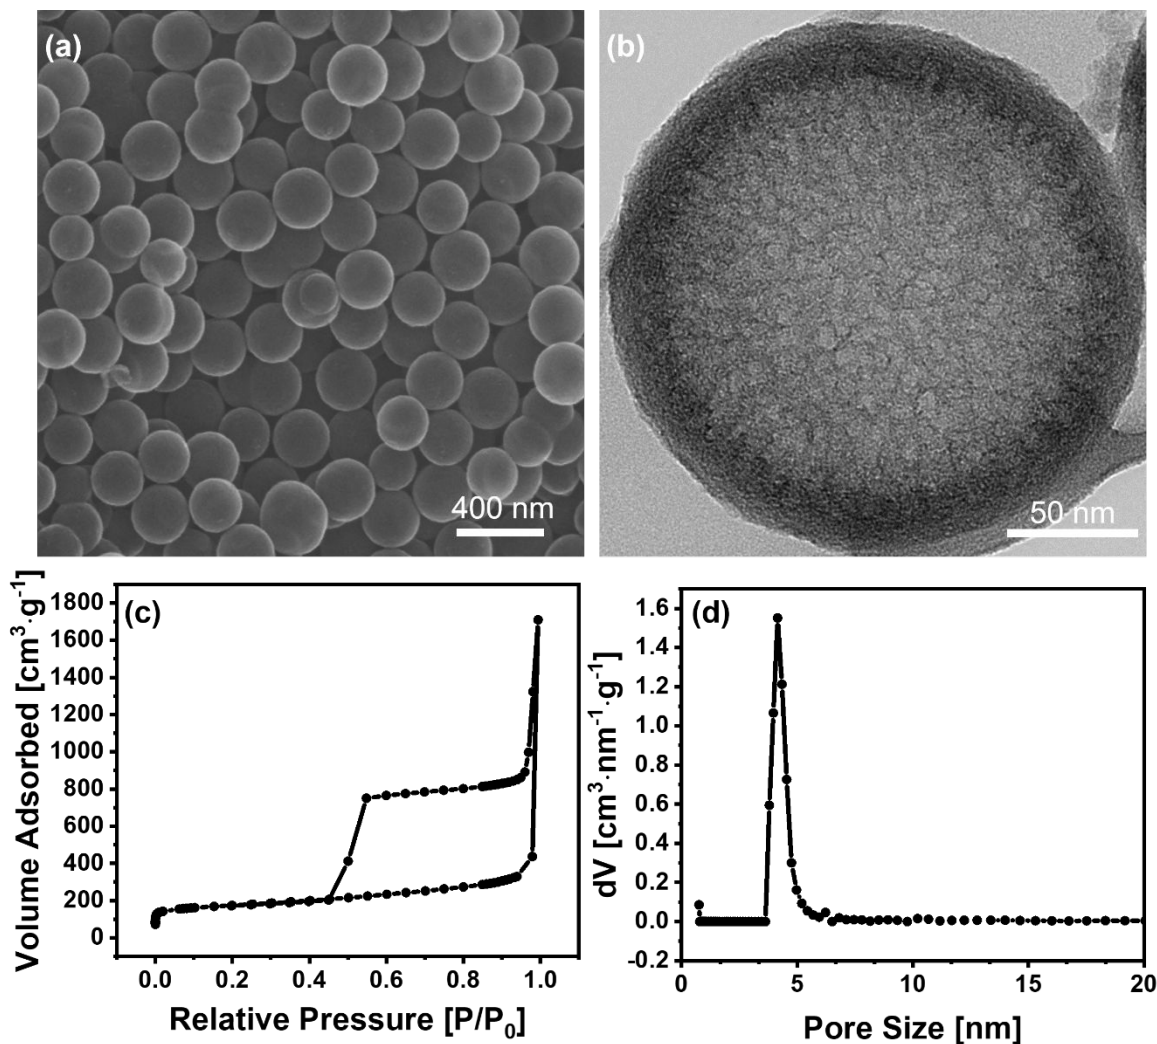

**Figure S3.** (a) SEM and (b) TEM images of the porous hollow carbon spheres (PHCS). (c)  $N_2$  adsorption isotherm and (d) pore size distribution curve for the same material.

**Discussion of Figure S3.** Scanning electron microscopy (SEM; **Figure S3a**) and transmission electron microscopy (TEM; **Figure S3b**) confirm that the nanoparticles were homogenous with average size of  $\sim 200$  nm. The specific surface area of the PHCSs, measured by nitrogen adsorption analysis, is  $593 \text{ m}^2 \cdot \text{g}^{-1}$  with a pore volume of  $1709 \text{ cm}^3 \cdot \text{g}^{-1}$  (**Figure S3c-d**).

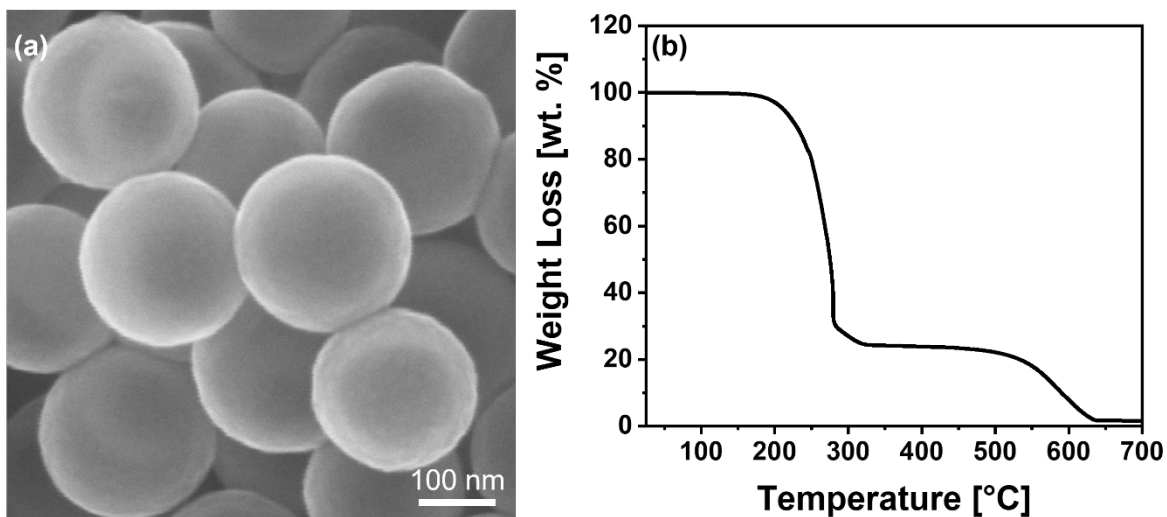

**Figure S4.** (a) SEM image for S-PHCS. (b) TGA curve for the S-PHCS composite, yielding a sulfur content of 75 wt. % at a ramp rate of  $10\text{ }^{\circ}\text{C}\cdot\text{min}^{-1}$  under air flow.

**Discussion of Figure S4.** The SEM image in **Figure S4a** shows that sulfur is uniformly distributed to afford the composite material S-PHCSs, and no bulk sulfur deposits are visible. Thermogravimetric analysis (TGA, **Figure S4b**) in flowing air further confirms the sulfur loading to be 75 wt. %, and shows two regions of sulfur loss. The 70 wt. % sulfur loss below 280 °C is attributed to sulfur in the mesoporous shell and near the inner surface. At 300 °C, an additional 5 wt. % loss is attributed to sulfur confined deep in the interior structure of the carbon spheres. The weight loss at around 580 °C is due to oxidation of the PHCSs.



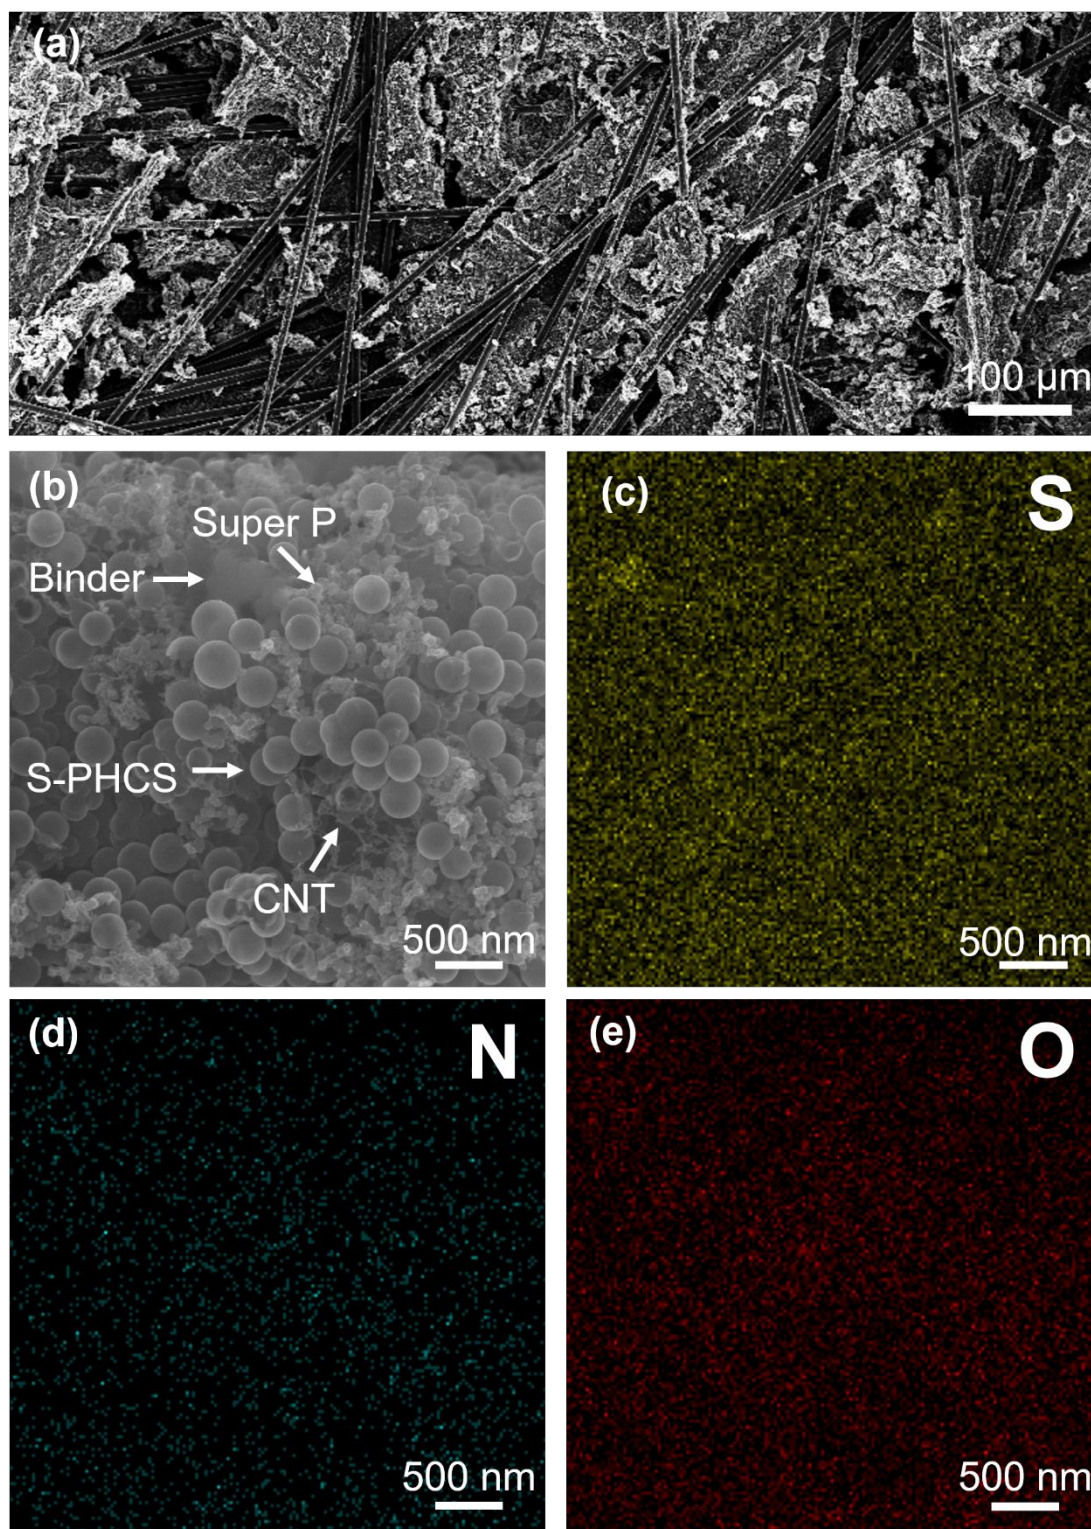

**Figure S5.** (a) SEM image of the P50 carbon paper current collector. (b-d) SEM EDAX analysis of the sulfur cathode fabricated with poly(AETMAC-co-EGDA). (b) SEM image; elemental mapping of (c) S; (d) N; and (e) O.

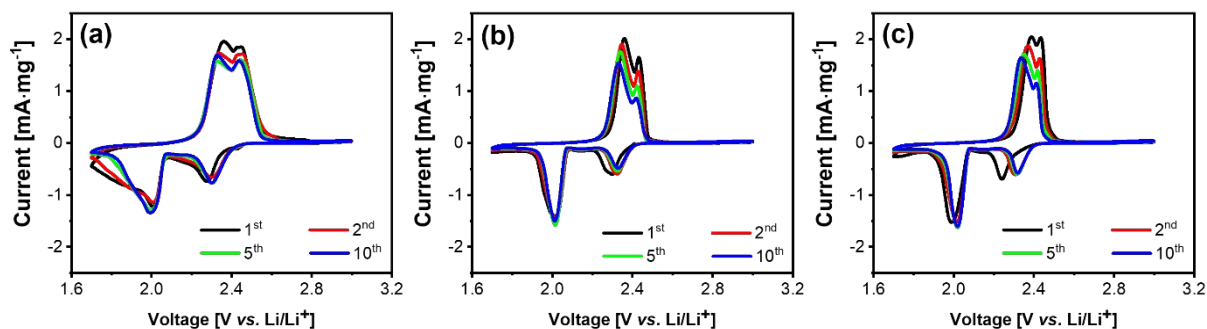

**Figure S6.** CV profiles conducted at a scan rate of  $0.1 \text{ mV s}^{-1}$  of the sulfur cathodes fabricated with (a) poly(AETMAC-*co*-EGDA), (b) poly(DADMAC-*co*-EGDA) and (c) PVDF, shown at different sweep cycles. The small reduction in hysteresis between the 1<sup>st</sup> and subsequent cycles, most evident for PVDF, is ascribed to changes incurred on fully wetting the electrode on the first cycle.

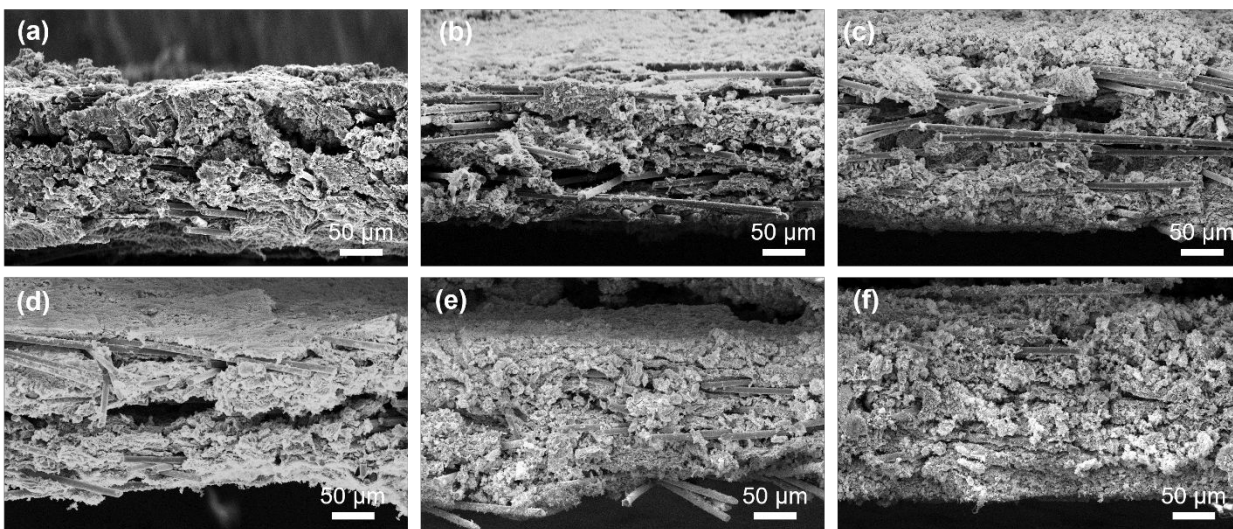

**Figure S7.** SEM images of the cross-section of the sulfur cathodes (**a-c**) before and (**d-f**) after 10 cycles fabricated with (**a, d**) PVDF; (**b, c**) poly(DADMAC-*co*-EGDA); and (**c, f**) poly(AETMAC-*co*-EGDA).



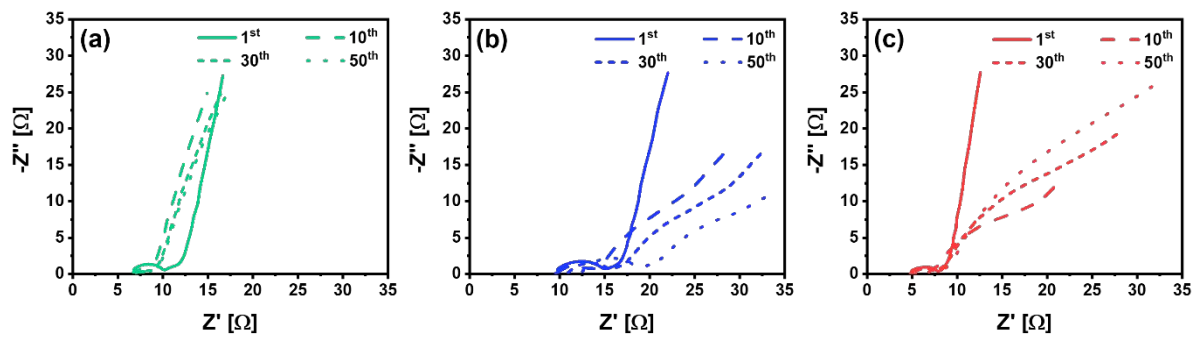

**Figure S8.** Electrochemical impedance spectroscopy: Nyquist plots of the sulfur cathodes fabricated with (a) PVDF, (b) poly(DADMAC-co-EGDA), and (c) poly(AETMAC-co-EGDA) at different cycle numbers.

## References

- (1) Shen, S.; Zhu, Z.; Liu, F. Introduction of Poly[(2-acryloyloxyethyl trimethyl ammonium chloride)-co-(acrylic acid)] Branches onto Starch for Cotton Warp Sizing. *Carbohydr. Polym.*, **2016**, *138*, 280-289.
- (2) Aly, M. A. S.; Gauthier, M.; Yeow, J. On-Chip Cell Lysis by Antibacterial Non-Leaching Reusable Quaternary Ammonium Monolithic Column. *Biomed. Microdevices*, **2016**, *18*:2.
